# Supplementary material
Source: MDPI journal article supplement (https://www.mdpi.com/2071-1050/15/23/16448)
Supplement: s1 [file s1 › sustainability-2698335-Supplementary.pdf]

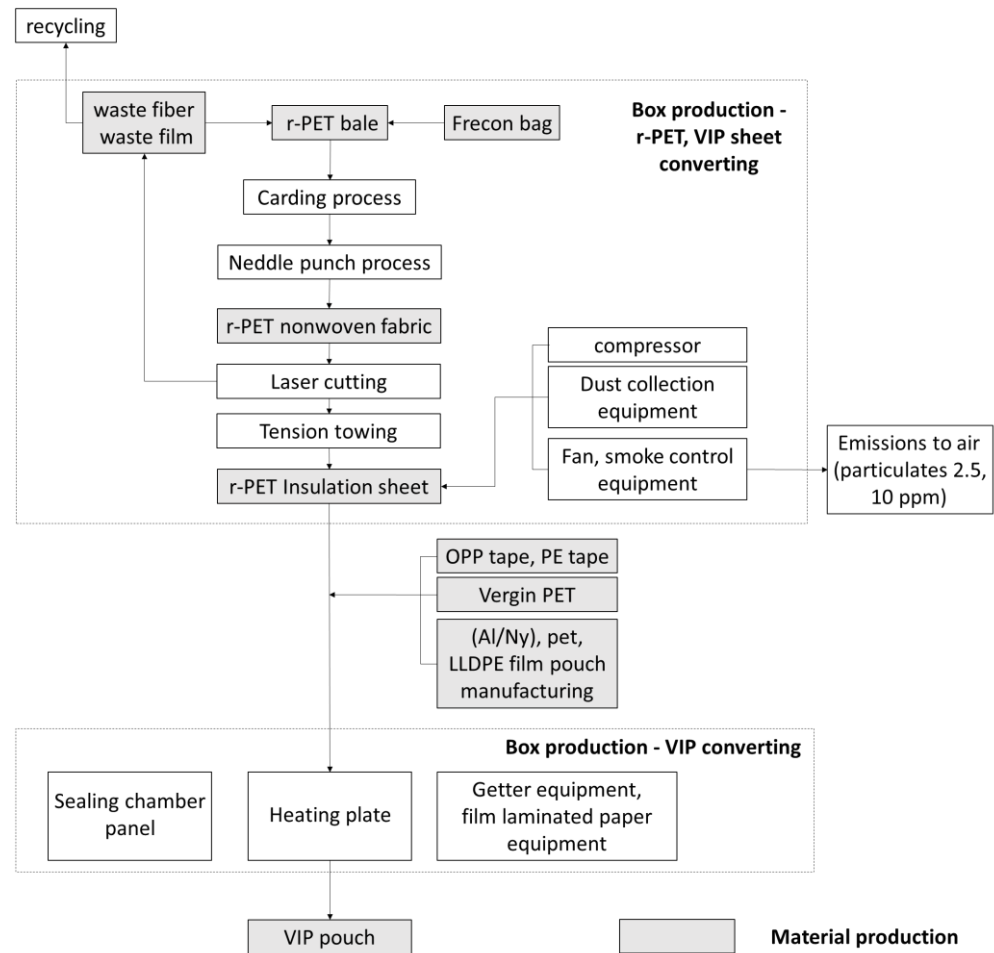

**Figure S1.** System boundary of r-PET insulation sheet and VIP pouch.

**Table S1.** Transportation distance of EPS box.

| Transportation                                | km  | Description                                                                                                                            |
|-----------------------------------------------|-----|----------------------------------------------------------------------------------------------------------------------------------------|
| Transport of raw materials                    | 500 | From EPS material supplier to EPS box manufacturing plant                                                                              |
| Transport of box                              | 120 | From EPS box manufacturing plant to fresh food manufacturing plant                                                                     |
| Transport of box with fresh food and ice pack | 41  | From fresh food manufacturing plants to consumers near the market<br>(average distance according to distribution ratio by distributor) |
| Transport of box for recycling                | 15  | From consumers to EPS box recycling company                                                                                            |

**Table S2.** Transportation and Reconditioning transportation distance of VIP box.

|                               |                                               | km   | Description                                                                               |
|-------------------------------|-----------------------------------------------|------|-------------------------------------------------------------------------------------------|
| Transportation                | Transport of r-PET flake                      | 75   | From flake supplier to bale manufacturing plant (average distance)                        |
|                               |                                               | 5    | From bale manufacturing plant to sheet manufacturing plant                                |
|                               | Transport of VIP film                         | 2838 | From overseas film pouch factory to domestic VIP pouch manufacturing facility             |
|                               | Transport of VIP pouch                        | 4084 | From domestic VIP pouch manufacturing facility to overseas VIP box manufacturing facility |
|                               | Transport of box                              | 3935 | From overseas VIP box manufacturing facility to domestic distribution center              |
|                               | Transport of box for treatment                | 15   | From consumers to box treatment center (average distance)                                 |
| Reconditioning transportation | Transport of box with fresh food              | 44   | From domestic distribution center to sub-terminal (average distance)                      |
|                               | Transport of box with fresh food and ice pack | 8.7  | From domestic sub-terminal to customers (average distance)                                |
|                               | Transport of box for washing                  | 8.7  | From customers to sub-terminal (average distance)                                         |
|                               | Transport of box for recovery                 | 60   | From customers to domestic recovery center (average distance)                             |
|                               | Transport of box for reuse after recovery     | 65   | From recovery center to domestic fulfillment center (average distance)                    |

**Table S3.** Transportation and Reconditioning transportation distance of EPE box.

|                               |                                               | km   | Description                                                                                                        |
|-------------------------------|-----------------------------------------------|------|--------------------------------------------------------------------------------------------------------------------|
| Transportation                | Transport of box material and box             | 1798 | From overseas box material manufacturing plant to box manufacturing plant and then to domestic distribution center |
|                               | Transport of box for treatment                | 15   | From consumers to box treatment center (average distance)                                                          |
| Reconditioning transportation | Transport of box with fresh food              | 44   | From domestic distribution center to sub-terminal (average distance)                                               |
|                               | Transport of box with fresh food and ice pack | 8.7  | From domestic sub-terminal to customers (average distance)                                                         |
|                               | Transport of box for washing                  | 8.7  | From customers to sub-terminal (average distance)                                                                  |
|                               | Transport of box for recovery                 | 60   | From customers to domestic recovery center (average distance)                                                      |
|                               | Transport of box for reuse after recovery     | 65   | From recovery center to domestic fulfillment center (average distance)                                             |
|                               |                                               |      |                                                                                                                    |

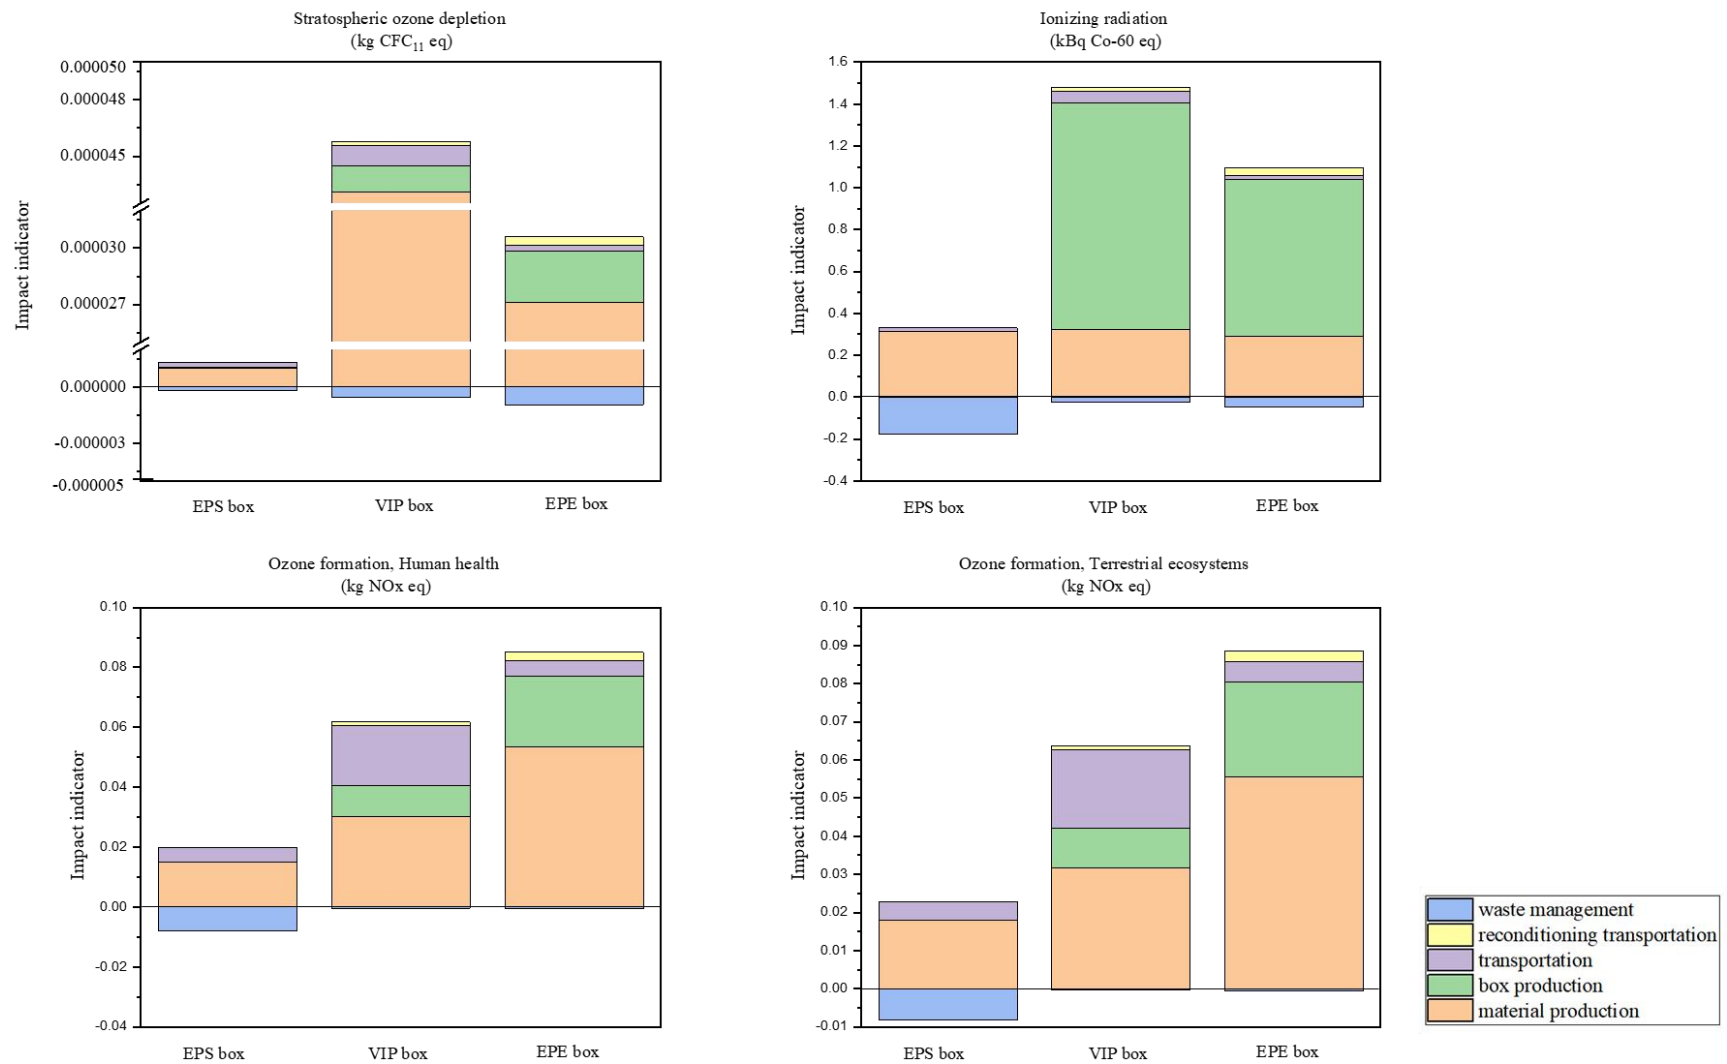

**Figure S2.** Potential impact results for scenarios 1 (1cycle).

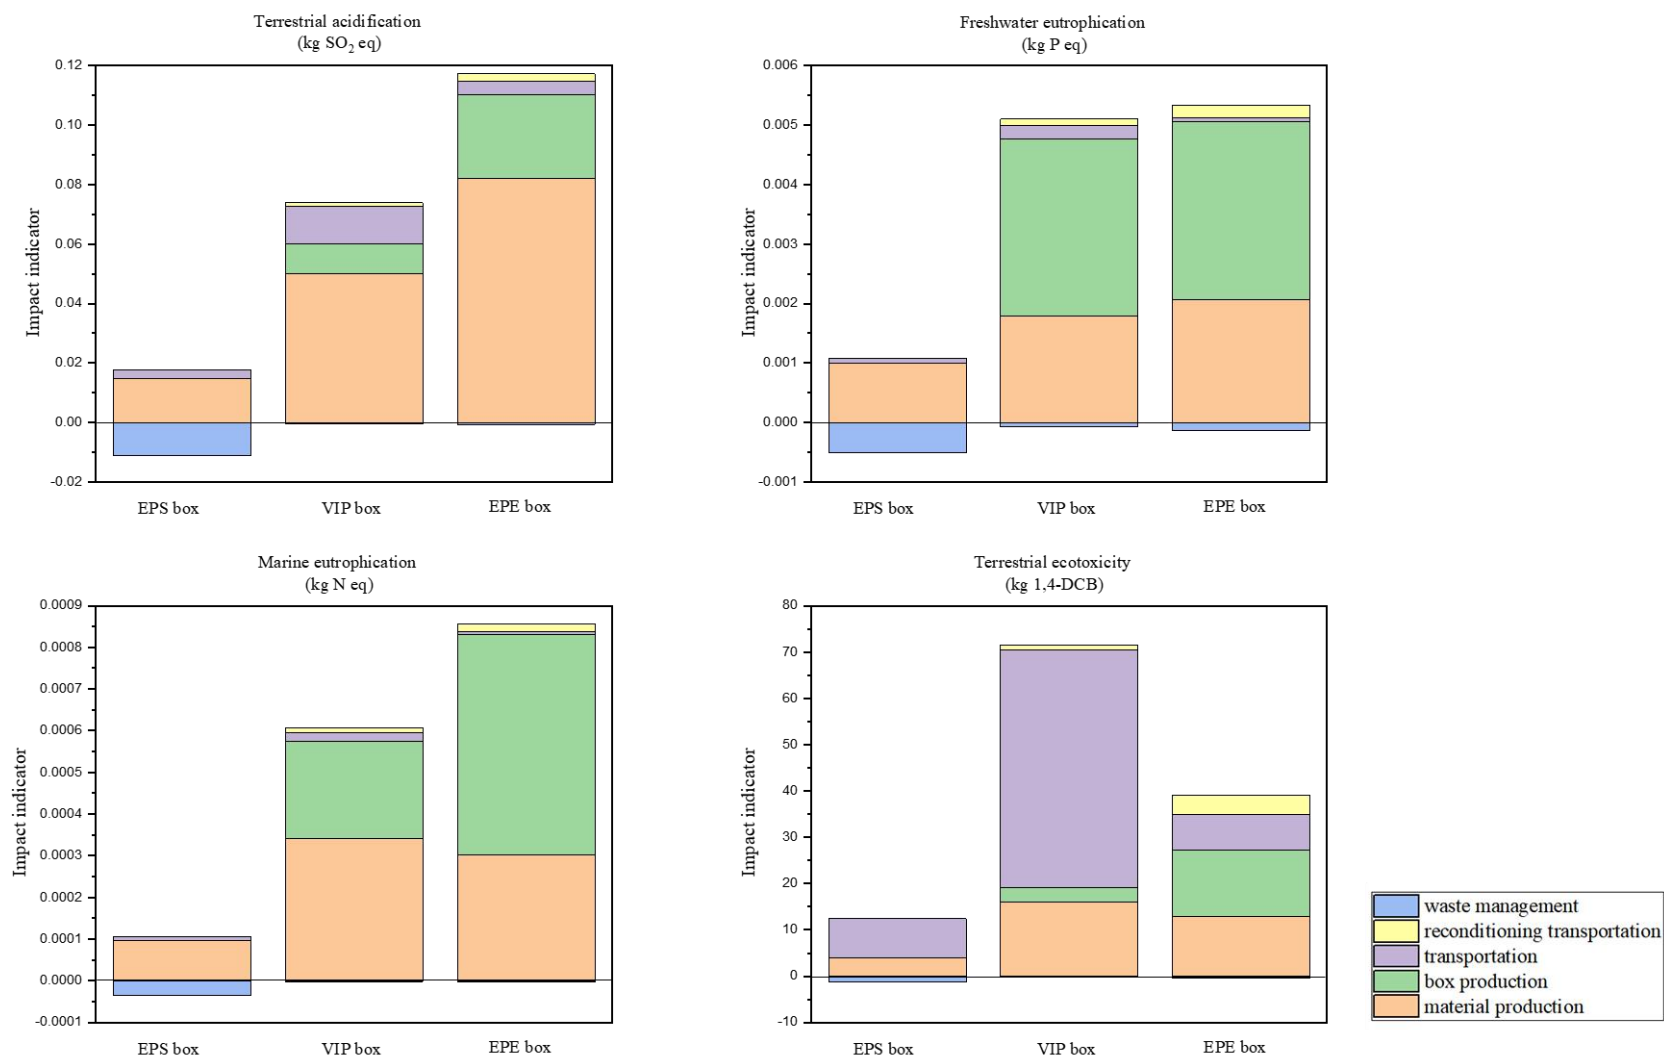

**Figure S3.** Potential impact results for scenarios 2 (1cycle).

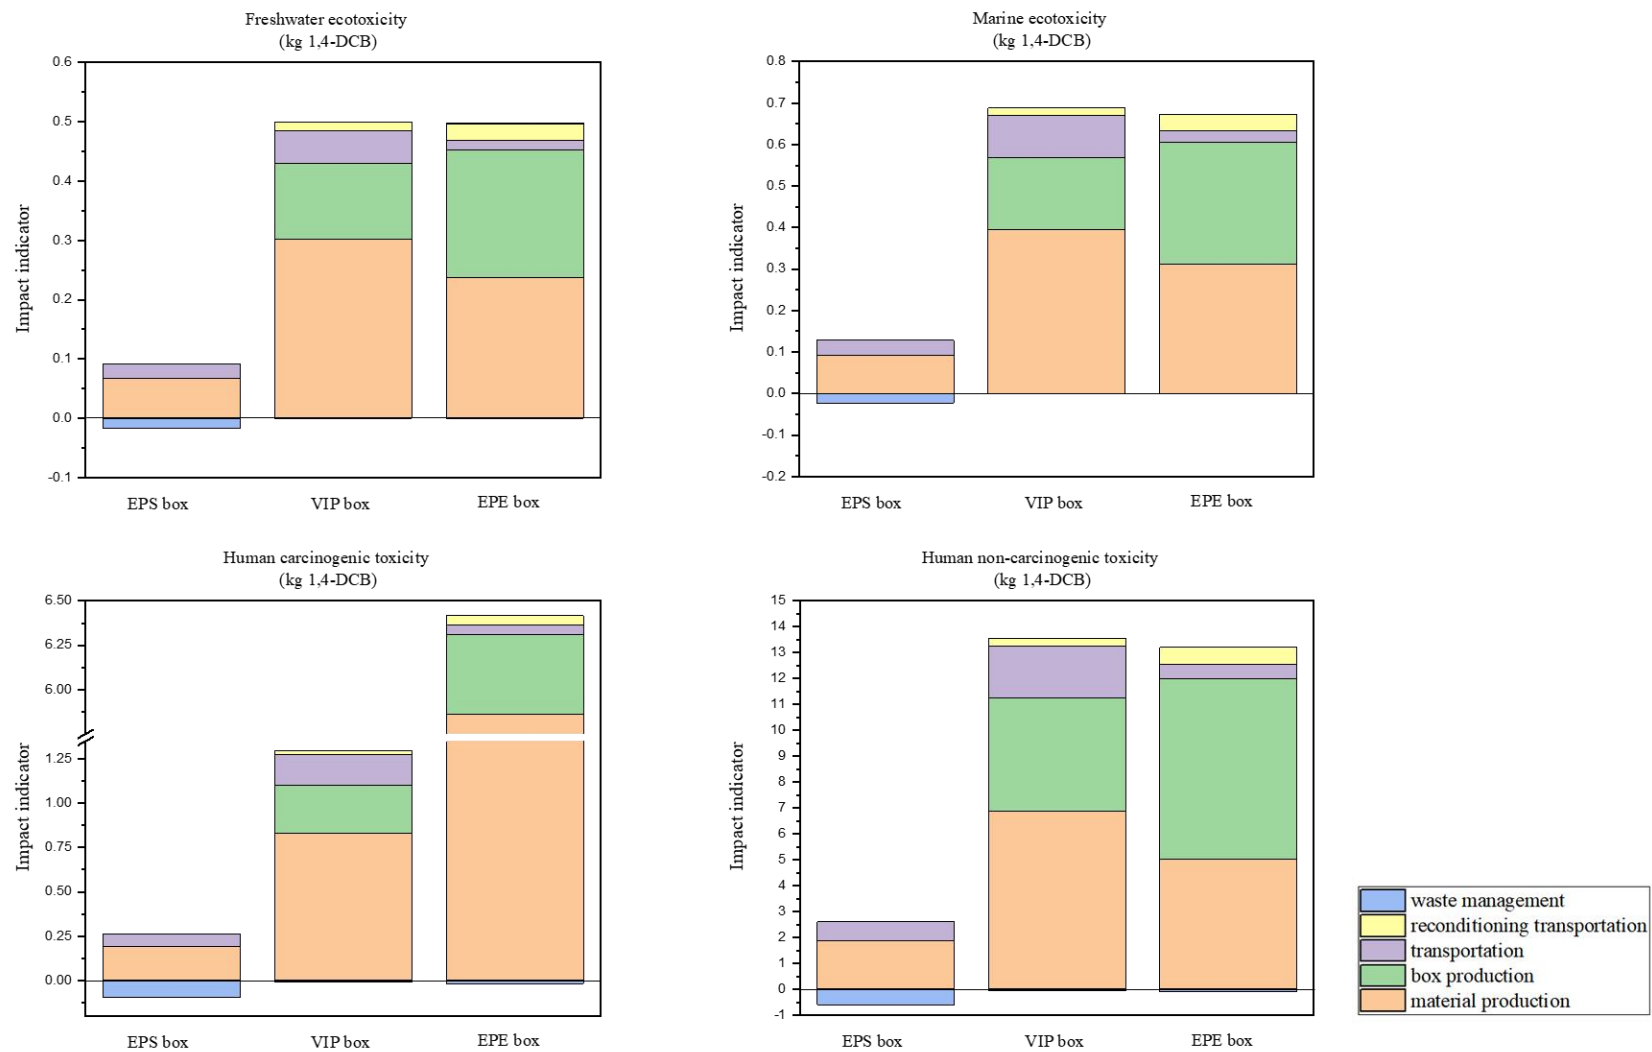

**Figure S4.** Potential impact results for scenarios 3 (1 cycle).

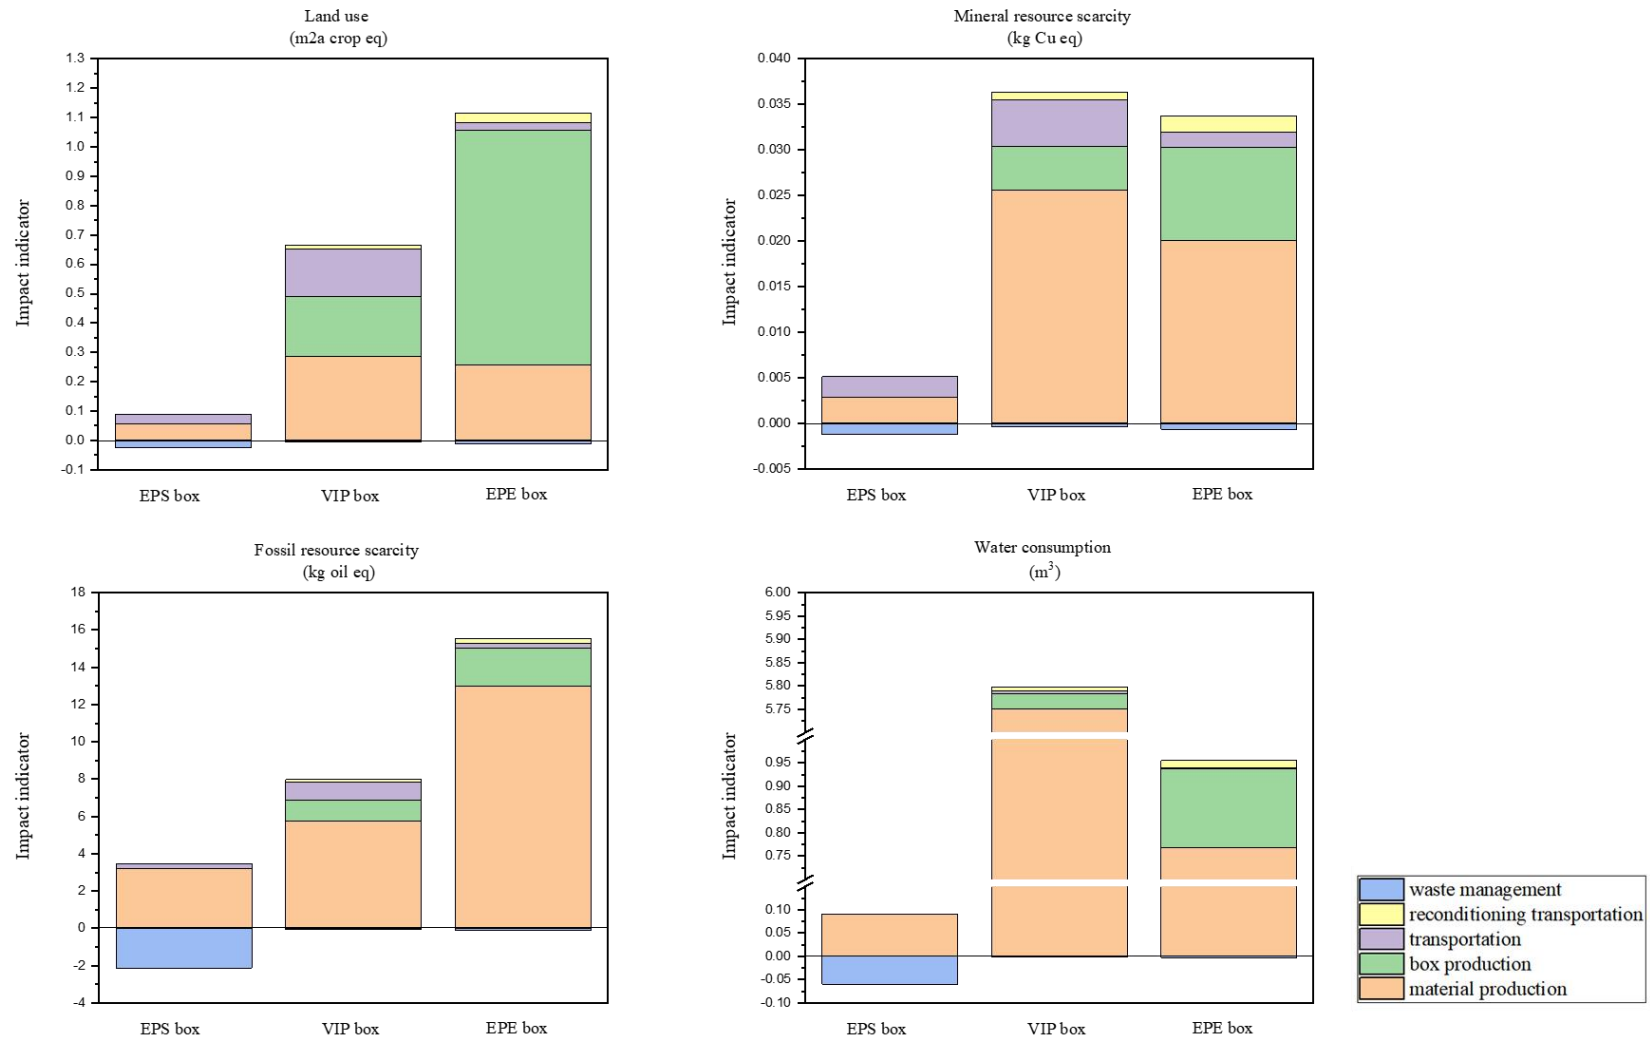

**Figure S5.** Potential impact results for scenarios 4 (1cycle).

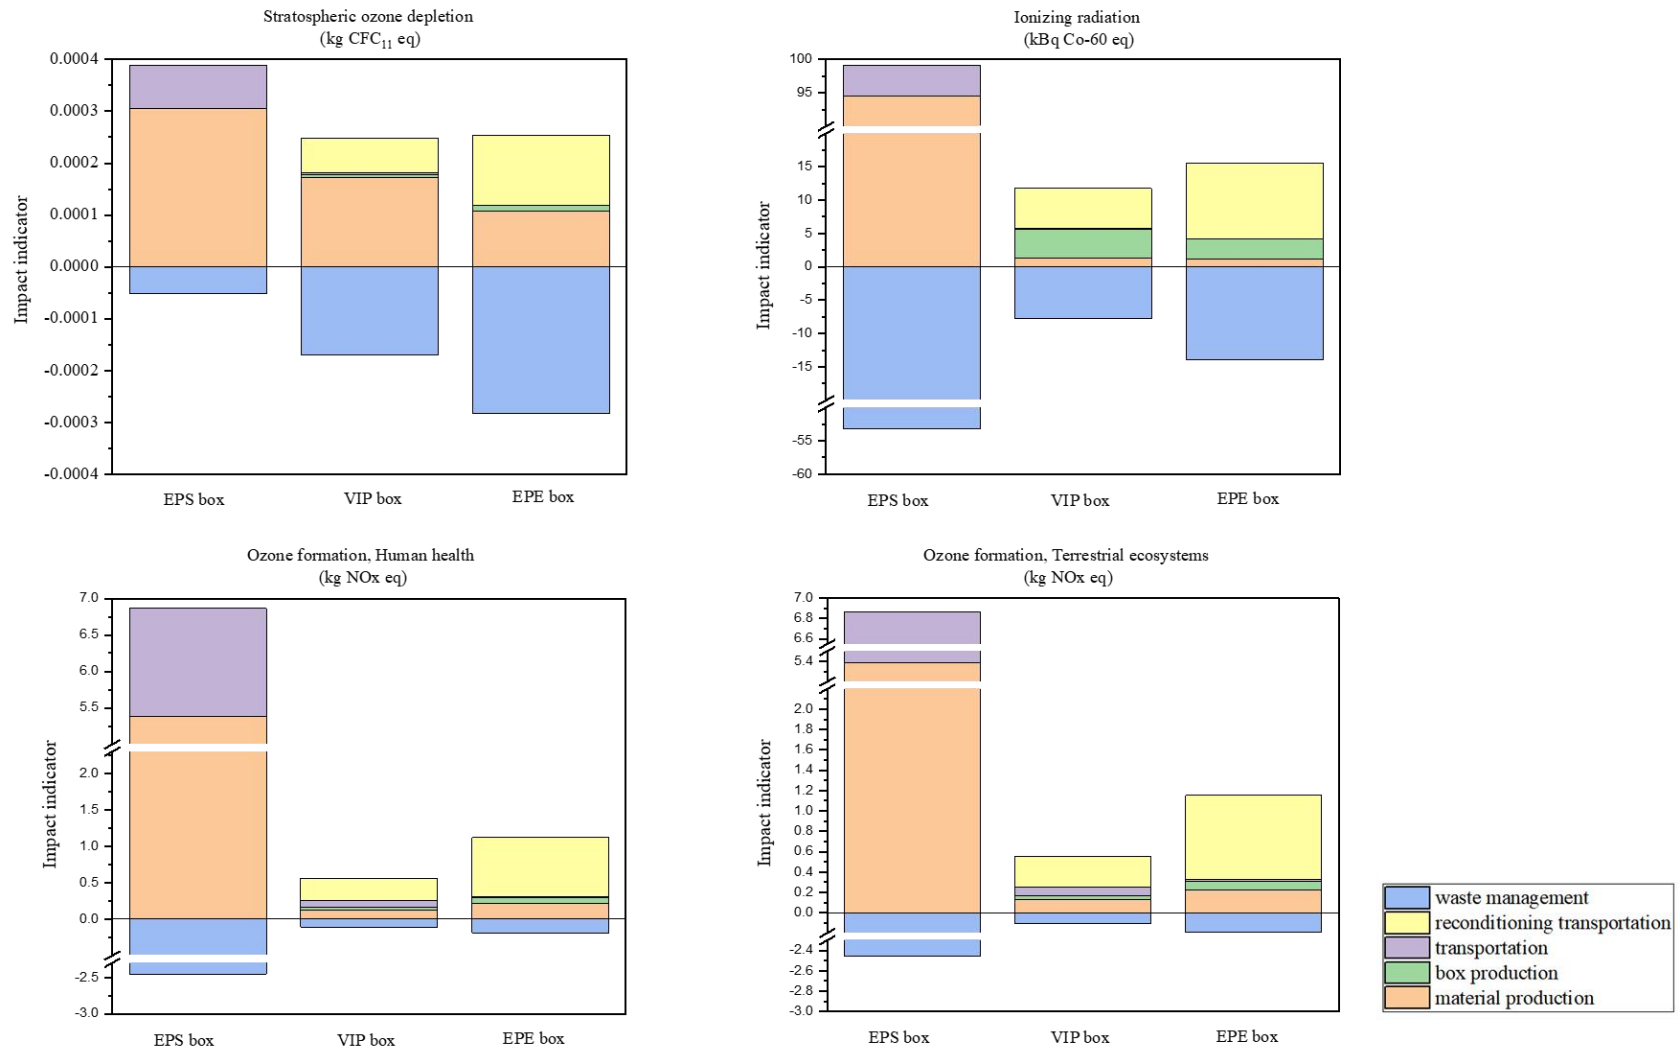

**Figure S6.** Potential impact results for scenarios 1 (300 cycle).

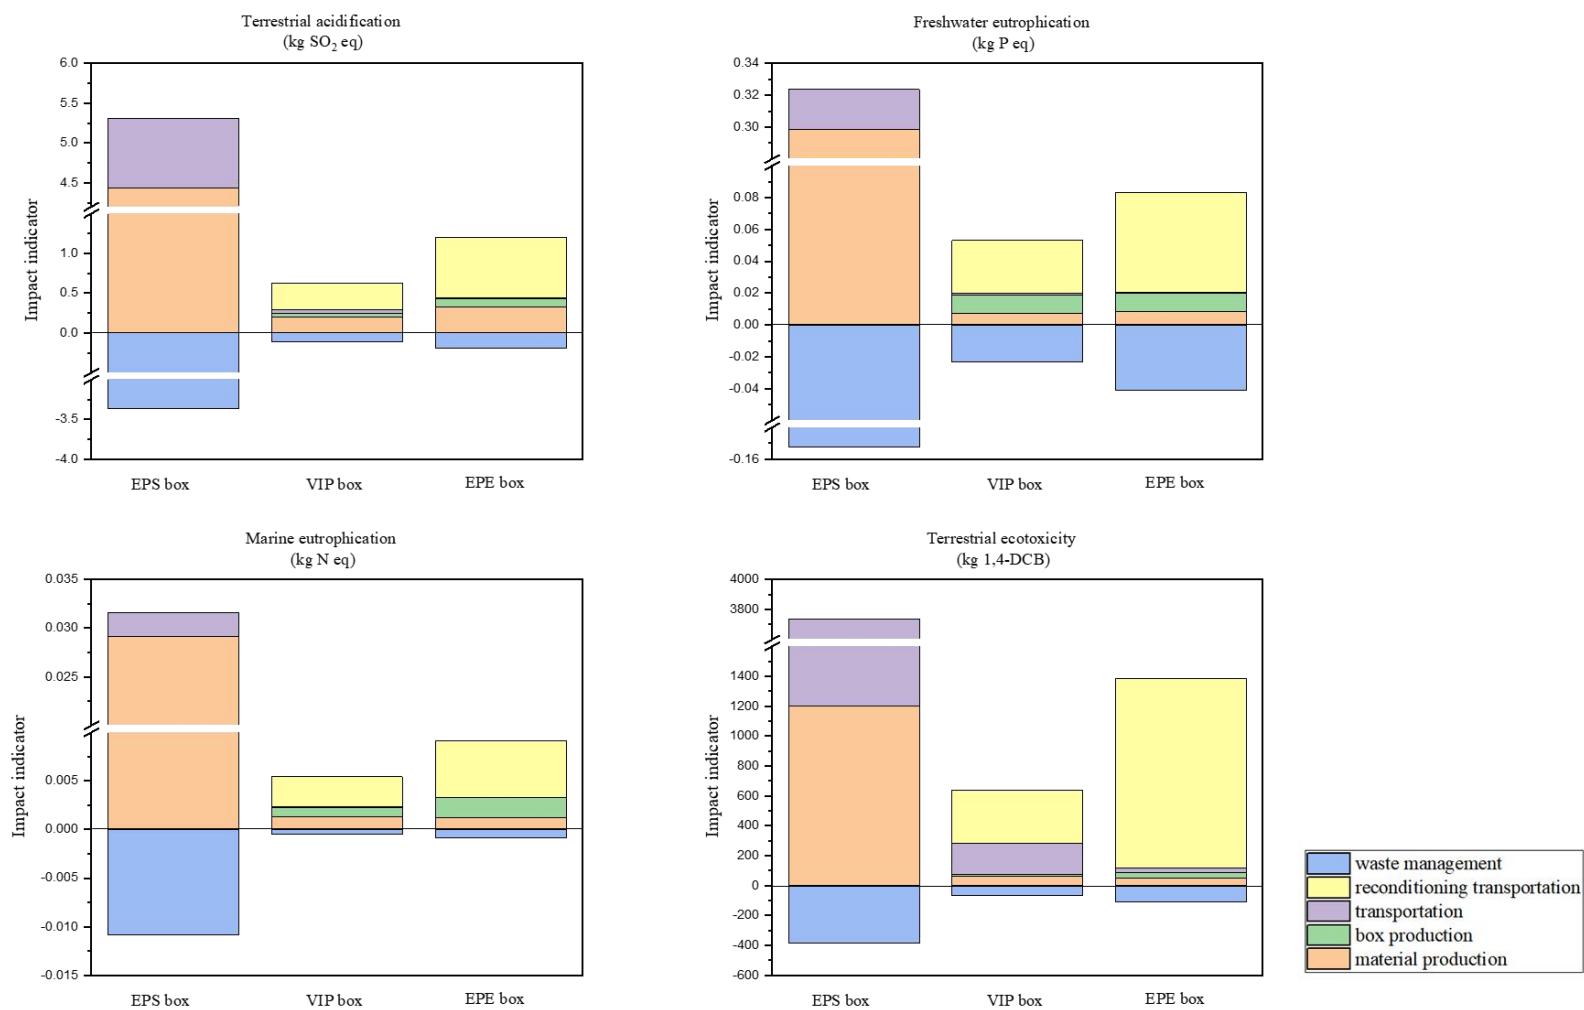

**Figure S7.** Potential impact results for scenarios 2 (300 cycle).

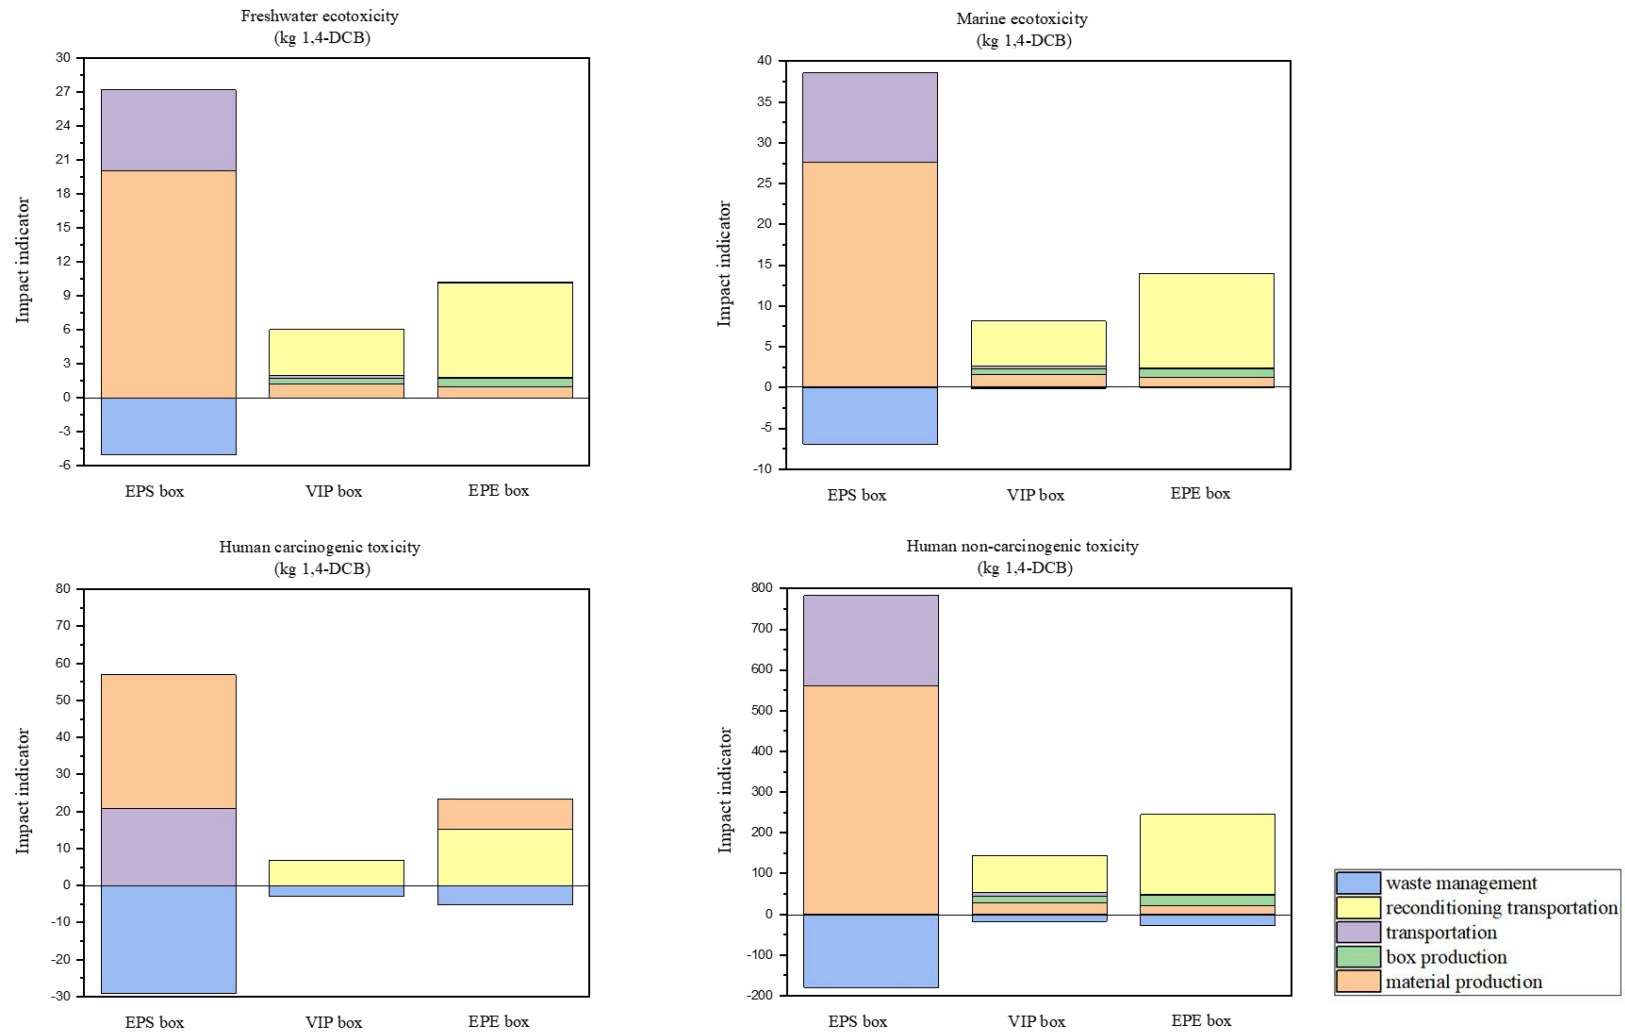

**Figure S8.** Potential impact results for scenarios 3 (300 cycle).

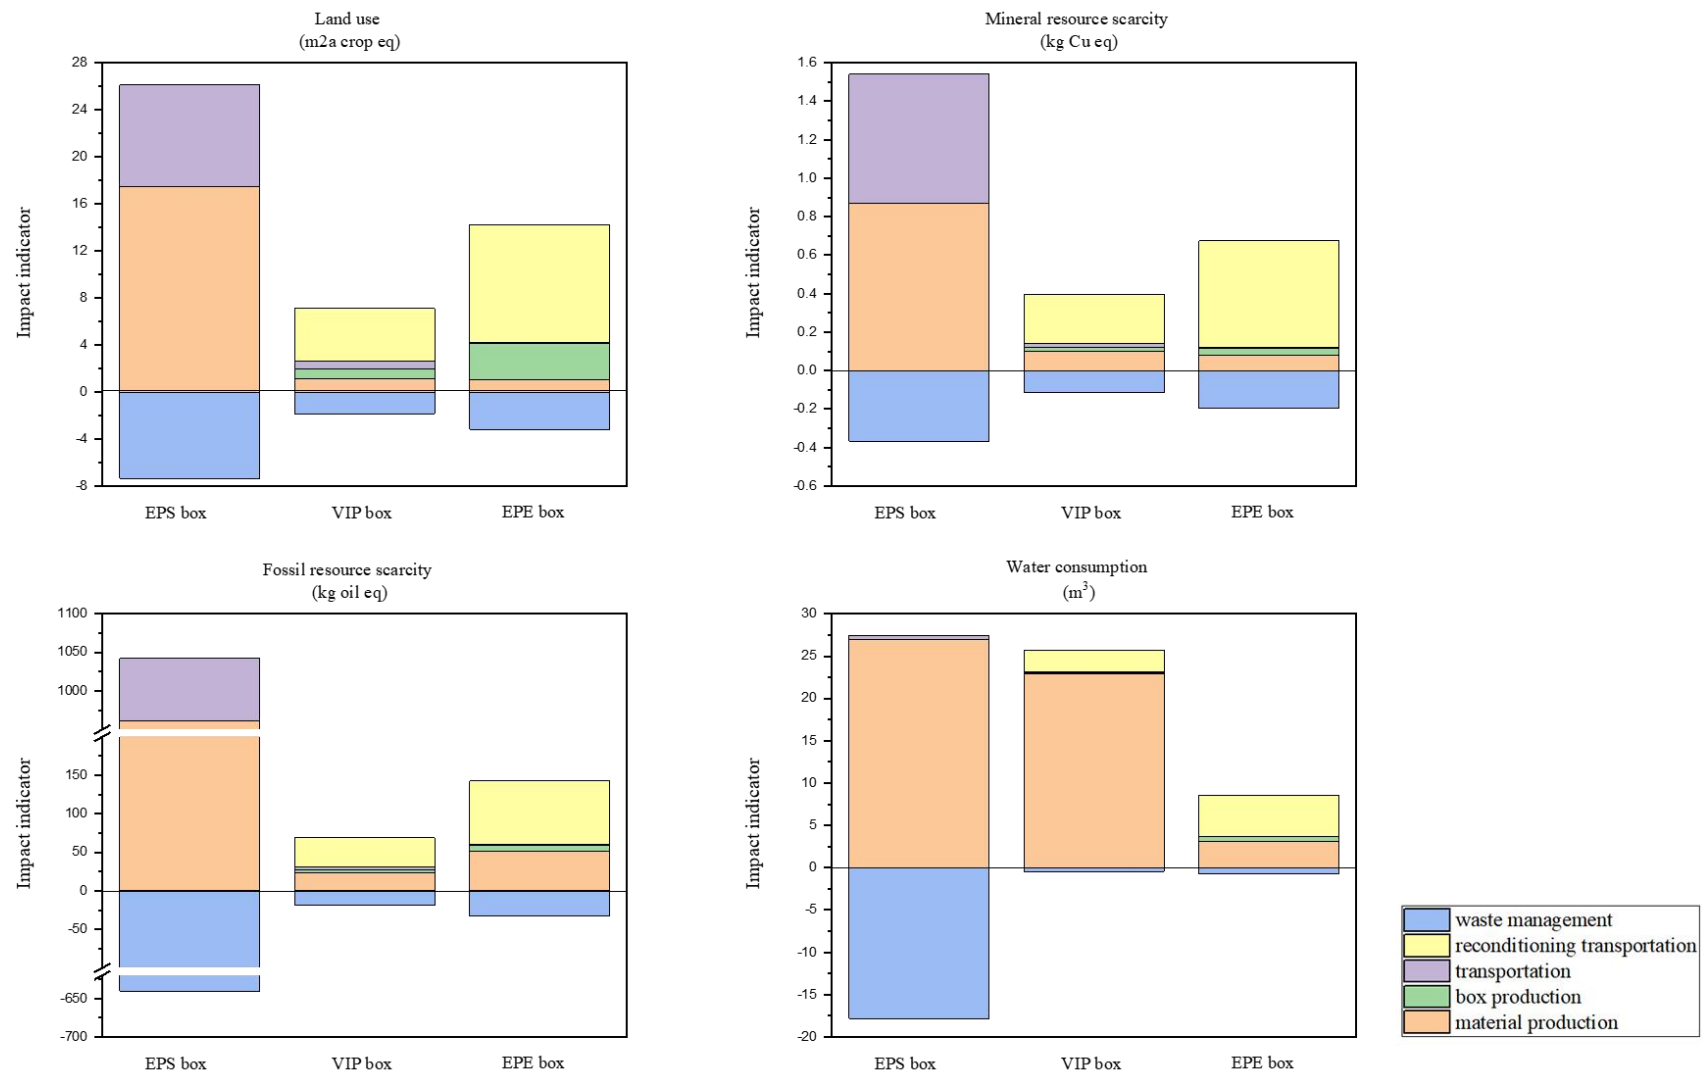

**Figure S9.** Potential impact results for scenarios 4 (300 cycle).

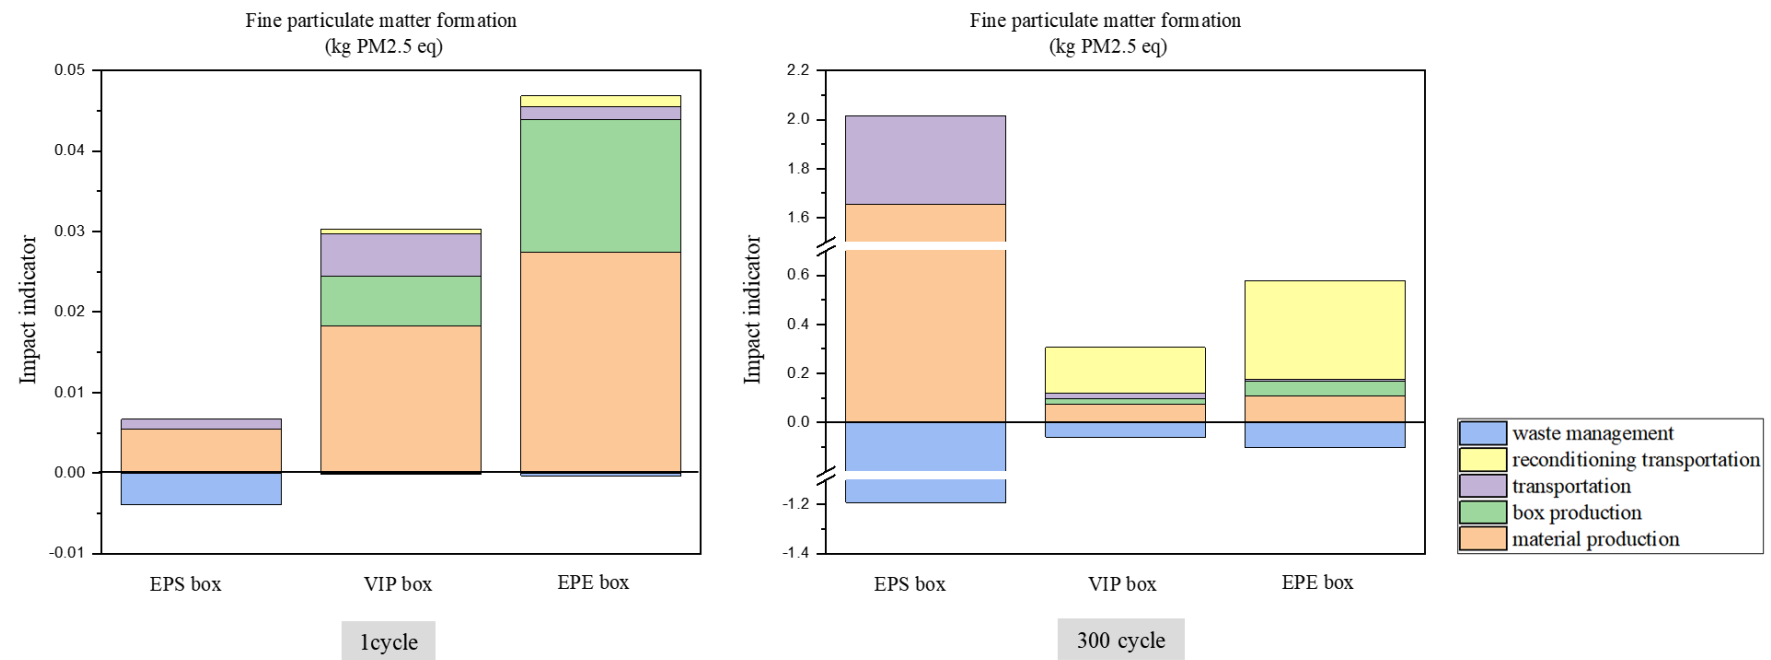

**Figure S10.** Fine particulate matter formation results for scenarios.
